# Supplementary material for: Modeling Stability of Alfalfa Yield and Main Quality Traits
Source: MDPI journal article supplement (doi:10.3390/agriculture14040542), 2024-03-29
Supplement: s1 [file s1]

## Supplementary material

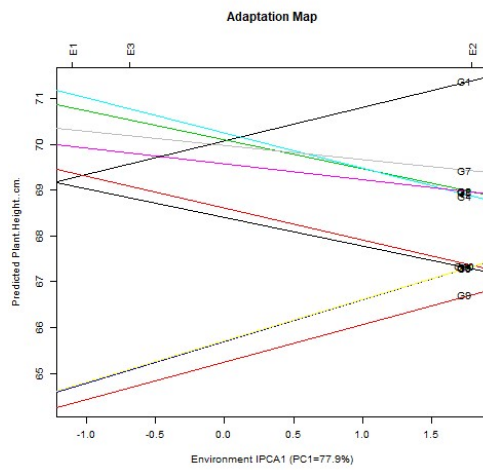

(a)

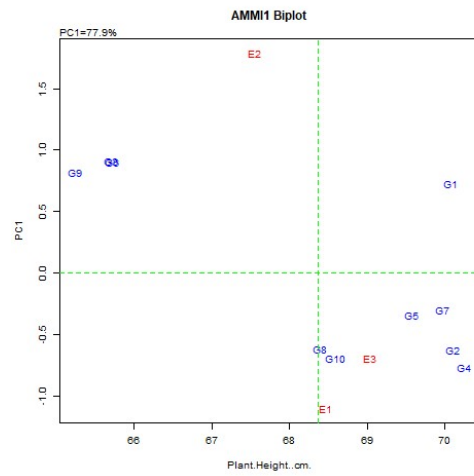

(b)

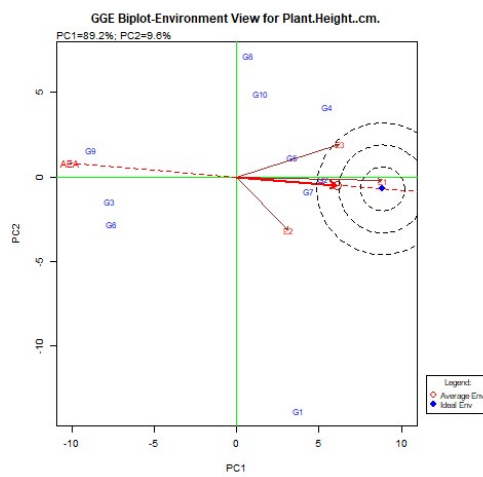

(c)

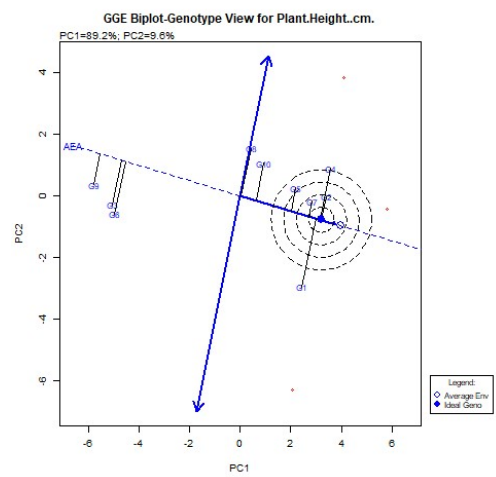

(d)

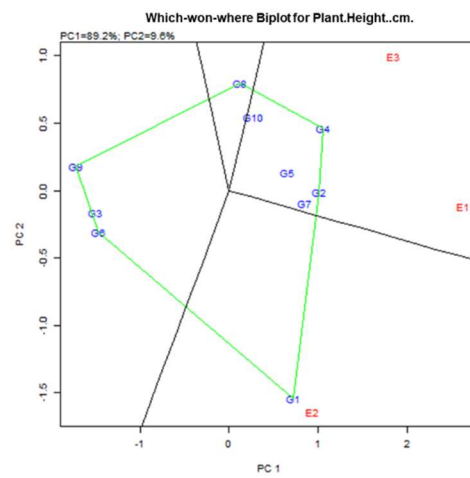

(e)

**Figure S1.** Plant height (cm) stability analysis, based on (a) AMMI adaptation map; (b) AMMI1 biplot; (c) Environmental stability GGE biplot; (d) Genotypic stability GGE biplot; (e) Which-won-where GGE biplot for specific adaptability of genotypes over environments. The genotypes closer to the ideal genotype are the desirable.

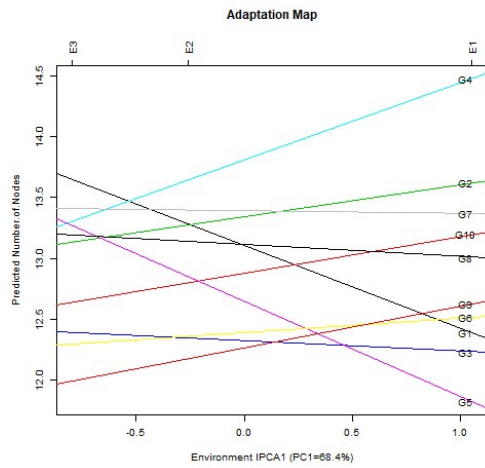

(a)

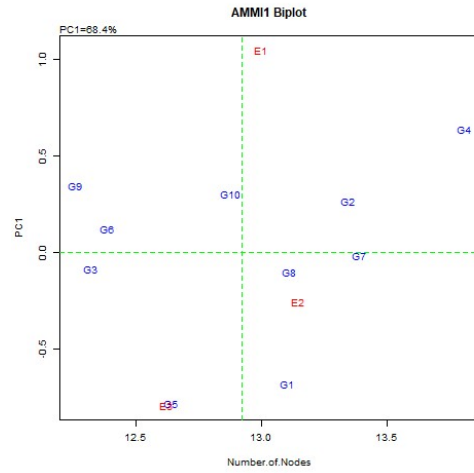

(b)

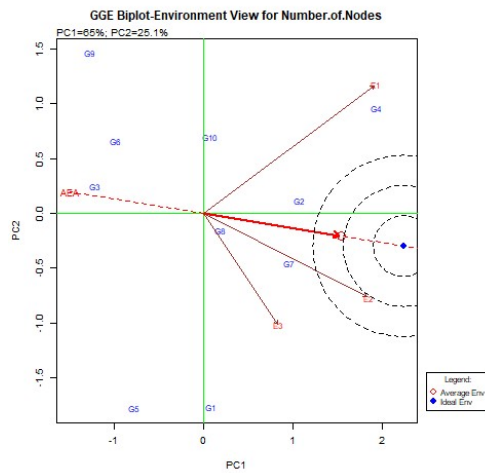

(c)

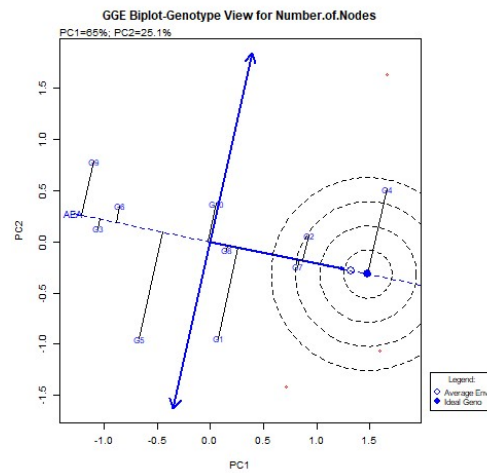

(d)

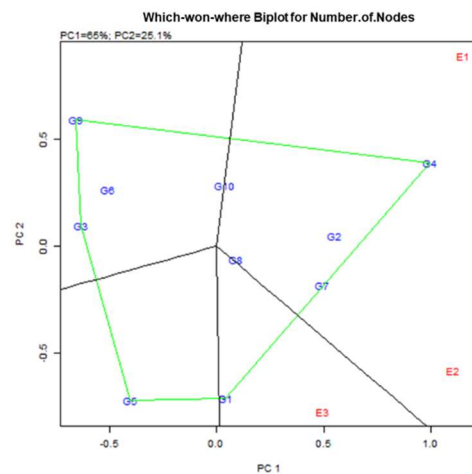

(e)

**Figure S2.** Number of nodes stability analysis, based on (a) AMMI adaptation map; (b) AMMI1 biplot; (c) Environmental stability GGE biplot; (d) Genotypic stability GGE biplot; (e) Which-won-where GGE biplot for specific adaptability of genotypes over environments. The genotypes closer to the ideal genotype are the desirable.

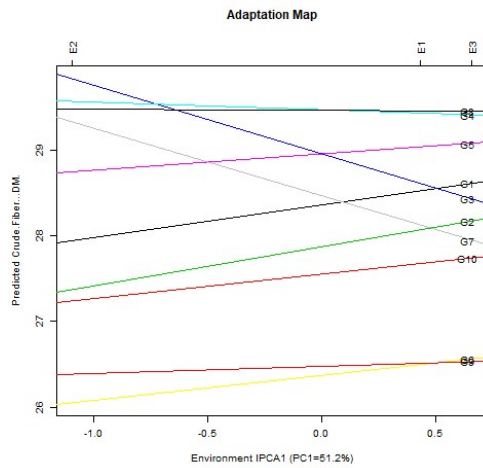

(a)

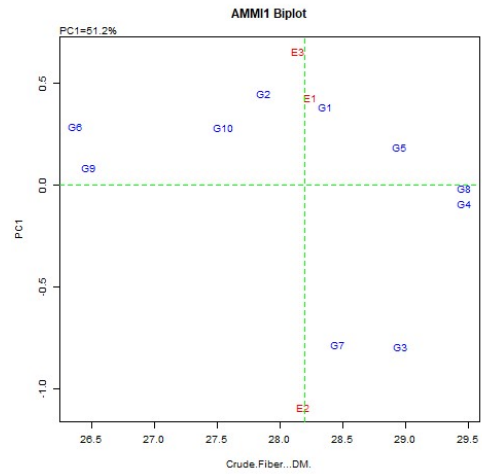

(b)

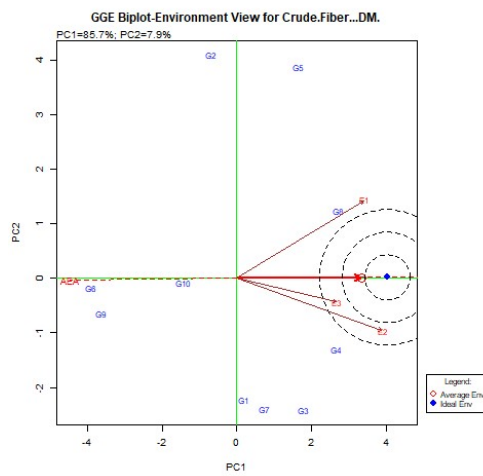

(c)

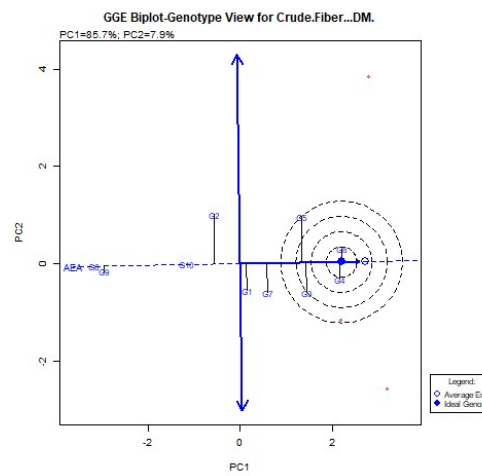

(d)

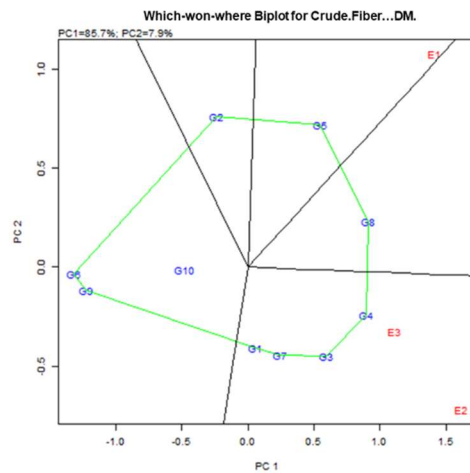

(e)

**Figure S3.** Crude fiber content (%DM) stability analysis, based on (a) AMMI adaptation map; (b) AMMI1 biplot; (c) Environmental stability GGE biplot; (d) Genotypic stability GGE biplot; (e) Which-won-where GGE biplot for specific adaptability of genotypes over environments. The genotypes closer to the ideal genotype are the desirable.

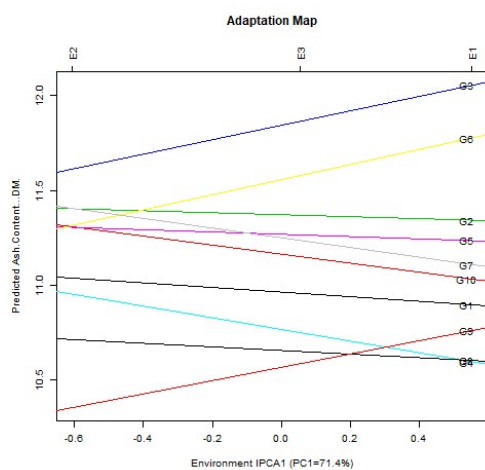

(a)

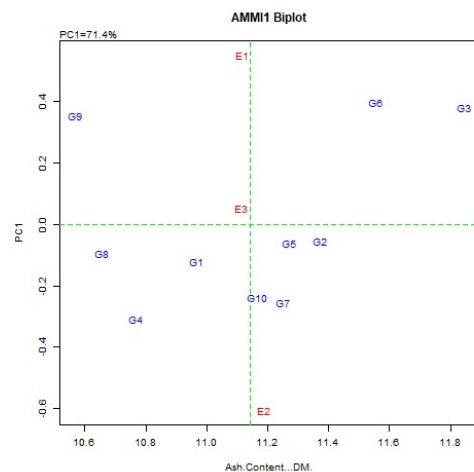

(b)

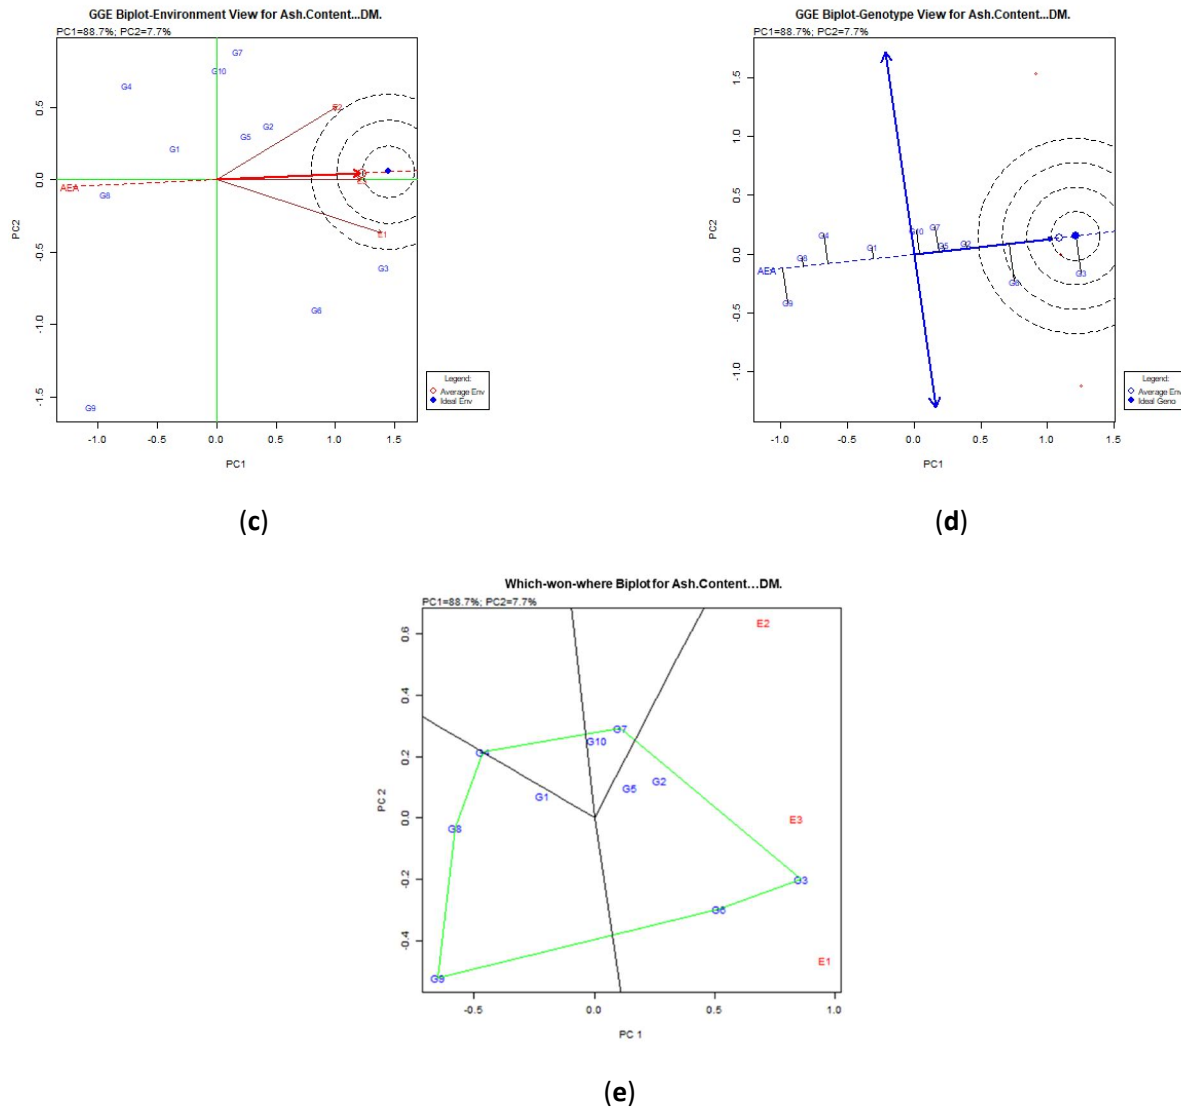

**Figure S4.** Ash content (%DM) stability analysis, based on (a) AMMI adaptation map; (b) AMMI1 biplot; (c) Environmental stability GGE biplot; (d) Genotypic stability GGE biplot; (e) Which-won-where GGE biplot for specific adaptability of genotypes over environments. The genotypes closer to the ideal genotype are the desirable.
